# Supplementary material
Source: publisher figshare collection journal article supplement (https://karger.figshare.com/ndownloader/files/24692414)
Supplement: Supplementary file 1 [file 24692414]

1 **Supplementary Figure S1. Contrast agent infiltration along the abdominal aorta**  
2 **after AngII infusion for 1, 2 and 3 days for ApoE<sup>-/-</sup> mice.** Quantification of the  
3 contrast agent infiltrates in different aortic segments: **(A)** intercostal, **(B)** celiac, **(C)**  
4 superior mesenteric/right renal and **(D)** left renal in ApoE<sup>-/-</sup> mice following AngII  
5 infusion at the indicated times. Data are expressed as mean  $\pm$  SEM and statistical  
6 significance was determined by one-way ANOVA followed by Dunnett's multiple  
7 comparison. \* :  $p \leq 0.05$ ; \*\* :  $p \leq 0.01$ ,  $n=6$  per group except intercostals day 2, where  
8  $n=5$ .

9

10 **Supplementary Figure S2. Contractions to KCl, normalized to vessels' length.**  
11 **(A-C)** Contraction induced by KCl (60 mM) was assessed in abdominal aortic  
12 segments and **(D-F)** side branches mounted in the wire myograph system. Data are  
13 expressed as mean  $\pm$  SEM and statistical significance was determined by unpaired t-  
14 test. \*\*  $p \leq 0.01$ ,  $n=5-7$  segments per group. For the AngII-infused celiac, superior  
15 mesenteric and left renal groups, length values were only available for  $n=3$  and  $n=4$  of  
16 the tested segments.

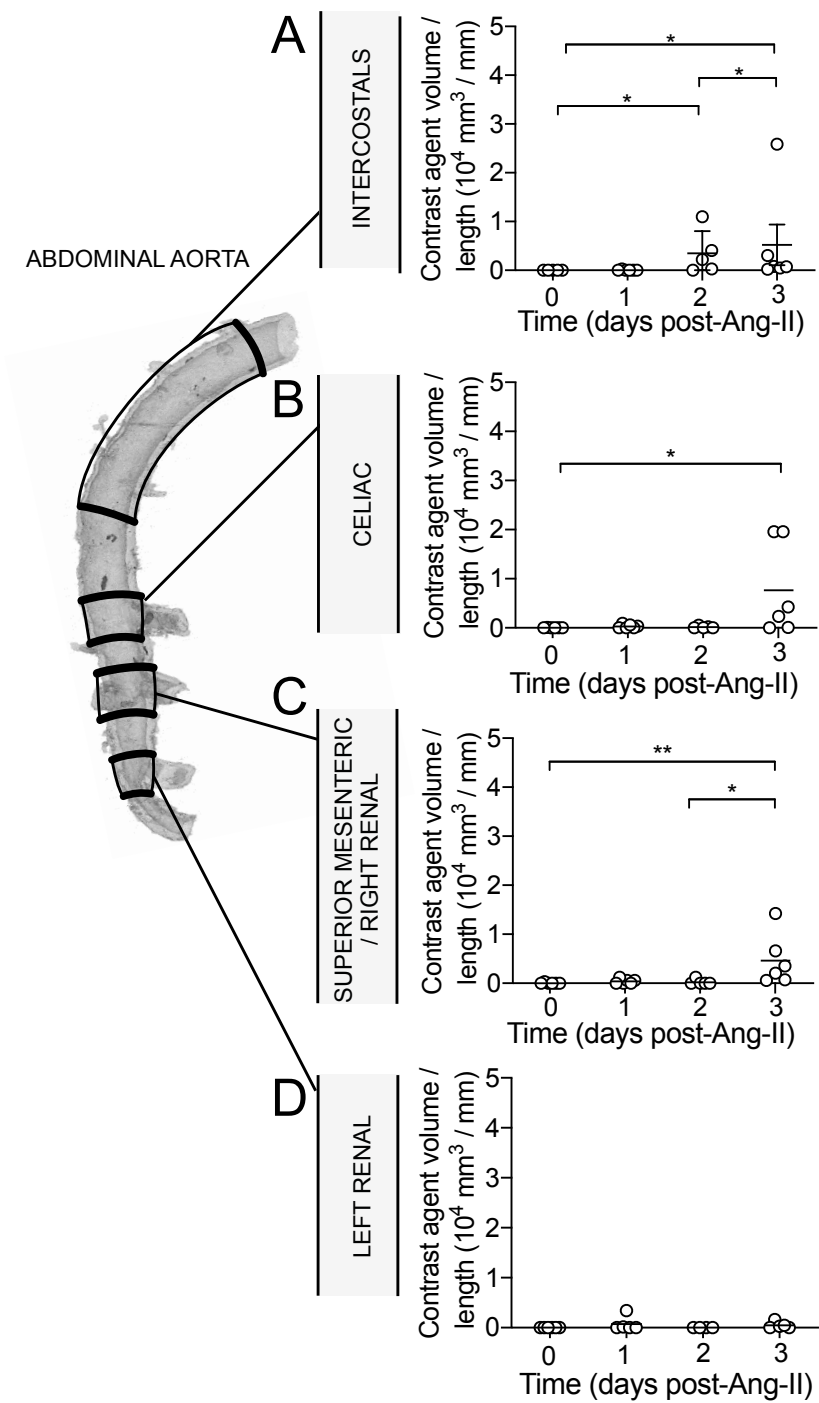

Supplementary Figure 1

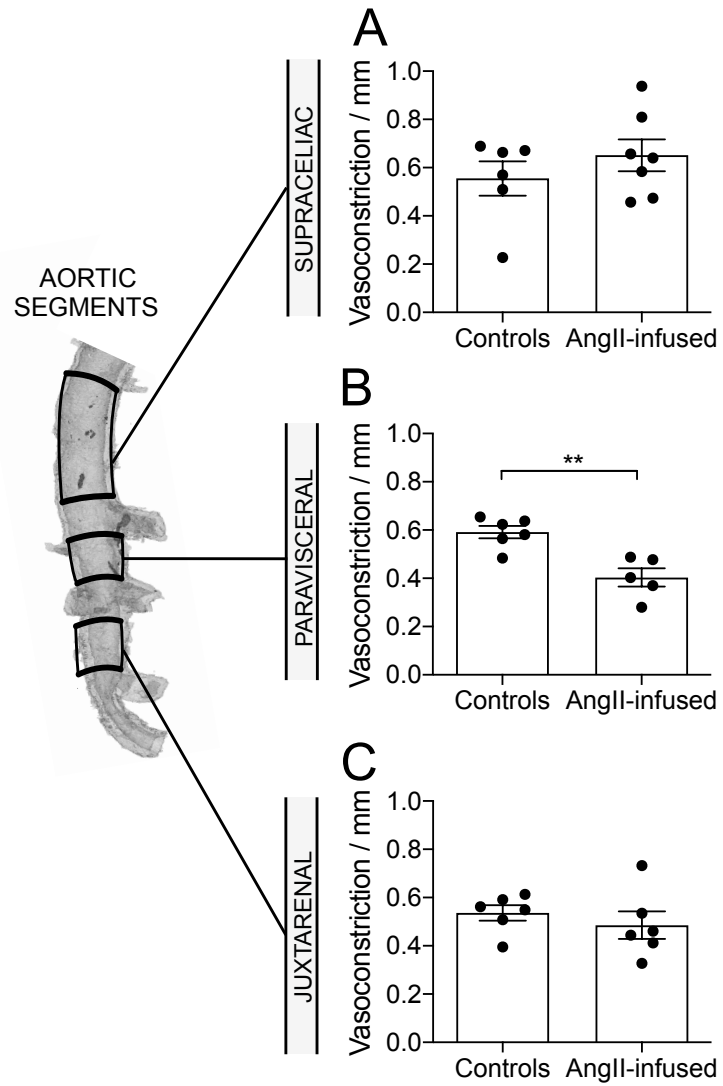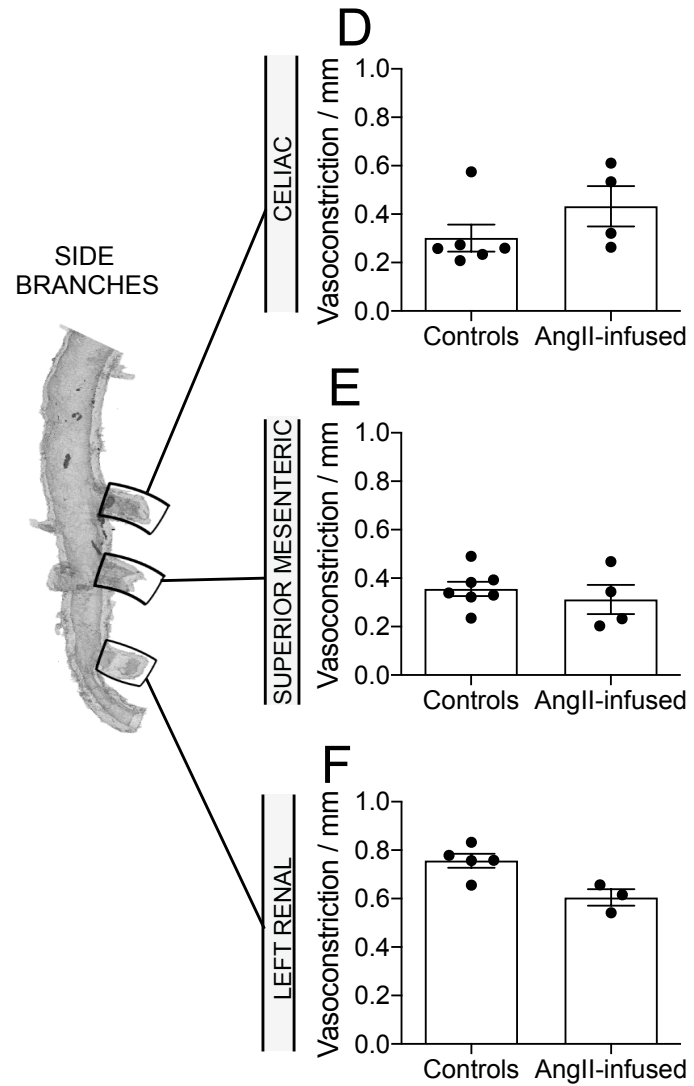

Supplementary Figure 2
